# Supplementary material
Source: PubMed Central journal article supplement (PMC2917310)
Supplement: JCO.2009.27.0215_1.pdf [file JCO.2009.27.0215_1.pdf]

## Genotyping Per3 KO.

Shearman LP, Jin X, Lee C, Reppert SM, Weaver DR. Targeted disruption of the mPer3 gene: subtle effects on circadian clock function. Mol Cell Biol. 2000 Sep; 20(17):6269-75.

Genotypes were determined by PCR analysis of tail biopsy DNA).

The PCR method was done using three different primers,

a forward primer in intron 3 (3-43; 5' TCTGTGAGTTCTTCCGTGTCTGTII) (present only in the wild-type [WT] allele),

a primer located in the NEO cassette (Neo6-2; 5'TGCCCCAAAGGCCTACCCGCTTCC), and

a common reverse primer in exon 4 (3-41; 5' GTCTTGAGGGGCAAGCAGGTCGAC).

The presence of the WT allele led to the amplification of a ca. 200-bp band from primers 3-43 and 3-41, while the presence of the targeted allele was detected by amplification of a ca. 400-bp band with primers Neo6-2 and 3-41

The PCR protocol consisted of 3 min at 95°C, 30 cycles of amplification (each consisting of 30 s at 94°C, 30 s at 60°C, and 90 s at 72°C), and a final extension phase (10 min at 72°C).

Products were separated on 1.5% agarose gels and viewed by UV transillumination with ethidium bromide.

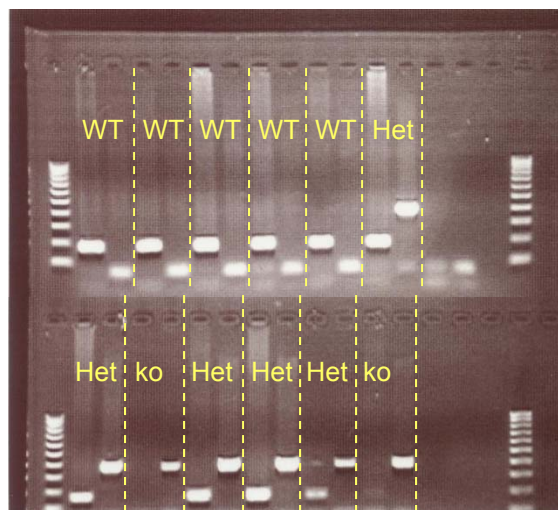

## MMTV-Neu Mice Genotyping.

Li B, Rosen JM, McMenamin-Balano J, Muller WJ, Perkins AS. neu/ERBB2 cooperates with p53-172H during mammary tumorigenesis in transgenic mice. Mol Cell Biol. 1997 Jun;17(6):3155-63

### Primers

Neu1: GGAAGTACCCGGATGAGGAGGGGCATATG

Neu2: CCGGGCAGCCAGGTCCCTGTGTACAAGCCG

### PCR reaction:

|                         |              |
|-------------------------|--------------|
| Hotstart PCR buffer     | 5 $\mu$ l    |
| Neu1 primer 10 $\mu$ M  | 1 $\mu$ l    |
| Neu2 primer 10 $\mu$ M  | 1 $\mu$ l    |
| 10 mM dNTP              | 1 $\mu$ l    |
| Hotstart Taq polymerase | 0.5 $\mu$ l  |
| DNA                     | 2 $\mu$ l    |
| H <sub>2</sub> O        | 39.5 $\mu$ l |

### Program: MMTV-Neu

94°C 15 min;

35 cycles of: 94°C 30 sec, 60°C 1 min, 72°C 1 min;

72°C 2 min; 20°C (o/n)

**Expectation:** MMTV-Neu 660 bp band, wt: no band

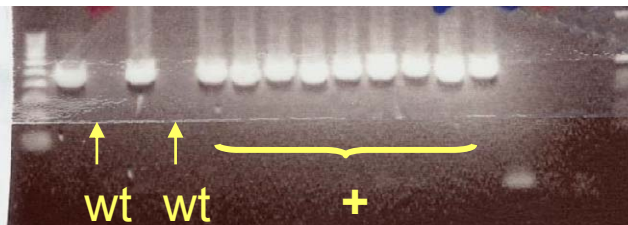

|                                 | n   | Pe3 copy number |     |        |     |      |     | p-value |
|---------------------------------|-----|-----------------|-----|--------|-----|------|-----|---------|
|                                 |     | Deleted         |     | Normal |     | Gain |     |         |
|                                 | n   | (%)             | n   | (%)    | n   | (%)  |     |         |
| <b>All patients</b>             | 180 | 33              | 18% | 117    | 65% | 30   | 17% |         |
| <b>Estrogen Receptor</b>        |     |                 |     |        |     |      |     |         |
| ER positive                     | 100 | 17              | 17% | 68     | 68% | 15   | 15% | 0.89    |
| ER negative                     | 58  | 12              | 21% | 34     | 58% | 12   | 21% |         |
| <b>Stage</b>                    |     |                 |     |        |     |      |     |         |
| I                               | 67  | 11              | 16% | 47     | 70% | 9    | 14% | 0.15    |
| II                              | 106 | 20              | 19% | 67     | 63% | 19   | 18% |         |
| <b>Age at diagnosis (years)</b> |     |                 |     |        |     |      |     |         |
| < 40                            | 19  | 2               | 11% | 12     | 63% | 5    | 26% | 0.02    |
| 40-50                           | 36  | 1               | 3%  | 29     | 80% | 6    | 17% |         |
| >= 50                           | 125 | 30              | 24% | 76     | 61% | 19   | 15% |         |
| <b>Histological Grade</b>       |     |                 |     |        |     |      |     |         |
| Well differentiated             | 26  | 3               | 12% | 16     | 62% | 7    | 27% | 0.65    |
| Intermediate                    | 55  | 12              | 22% | 37     | 67% | 6    | 11% |         |
| Poorly differentiated           | 10  | 2               | 20% | 6      | 60% | 2    | 20% |         |
| <b>Hormonal Status</b>          |     |                 |     |        |     |      |     |         |
| Premenopausal                   | 49  | 5               | 10% | 35     | 71% | 9    | 19% | 0.16    |
| Postmenopausal                  | 114 | 26              | 23% | 71     | 63% | 17   | 15% |         |
| <b>Treatment</b>                |     |                 |     |        |     |      |     |         |
| Chemo                           | 85  | 11              | 13% | 58     | 68% | 16   | 19% | 0.53    |
| Non Chemo                       | 95  | 22              | 23% | 59     | 62% | 14   | 15% |         |
| Only Hormonal                   | 59  | 16              | 27% | 37     | 63% | 6    | 10% |         |
| No Treatment                    | 36  | 6               | 17% | 22     | 61% | 8    | 22% |         |

**TABLE 1.** Frequency of copy number of *PER3* related with the clinical data of 180 lymph node negative breast cancer patients from Climent et al 2007.

The median follow up of all the patients is 82 months, range (1.5 – 219 months)

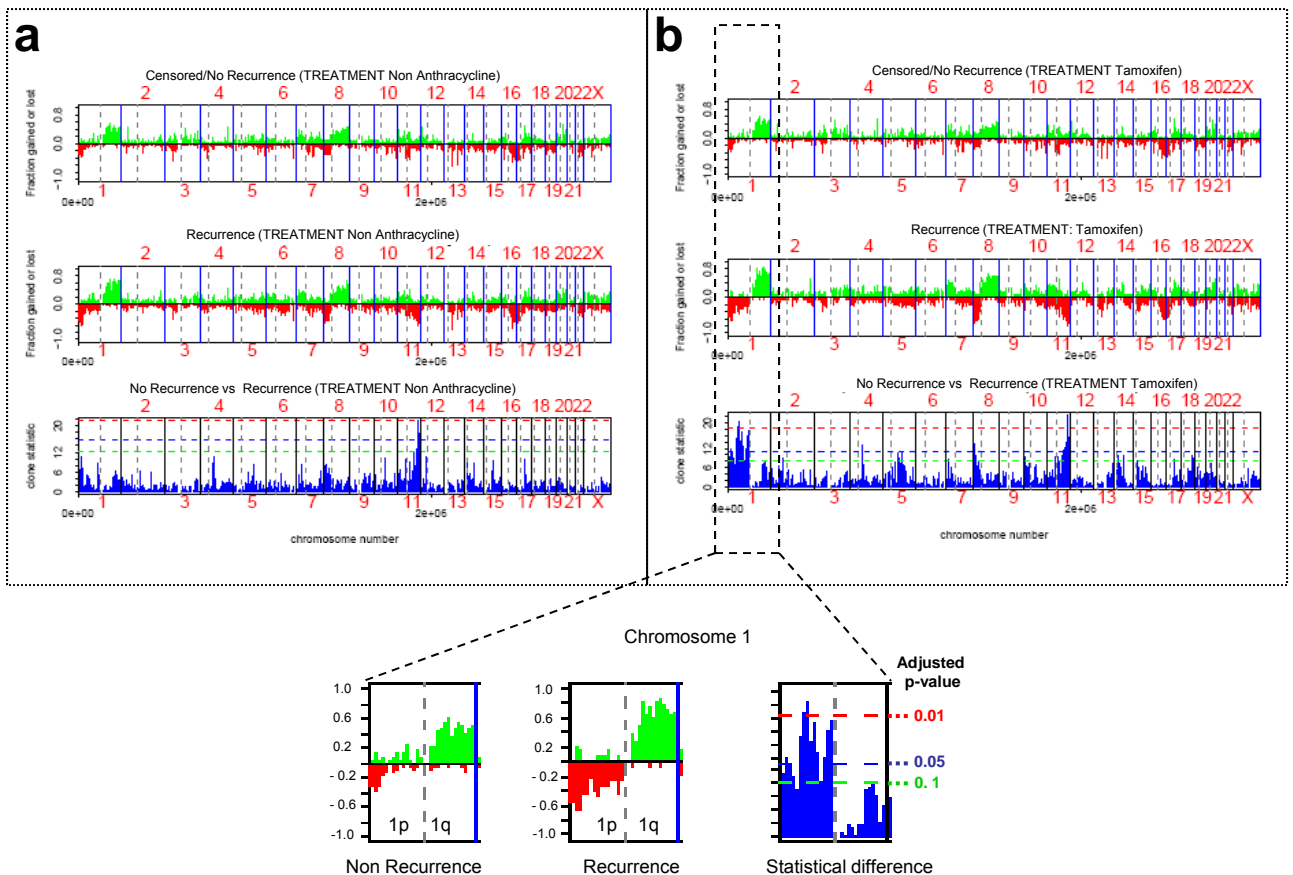

**Figure 1.- Copy number analysis by array-CGH .**

- (A) In 95 lymph node negative breast cancer patients who did not received systemic chemotherapy, BAC clones showing deletion and corresponding to chromosomal region 11q21-q25, were strongly associated with patient relapse (data previously published in Climent et al 2007).
- (B) In 59 patients from the previous group (A) who were ER and/or PGR positive and were treated only with tamoxifen, additional clones showing deletion and corresponding to chromosomal region 1p were strongly associated with patient recurrence.

**Genome-wide analysis of DNA-copy number changes of tumor samples was performed using array CGH on a microchip with ~2.460 BAC and P1 clones printed in triplicate (UCSF Hum Array 2.0) with a resolution of 1.4 Mb across the genome. Methods and analytical procedures have been described previously in detail.**

Climent J, Dimitrow P, Fridlyand J, et al. Deletion of chromosome 11q predicts response to anthracycline-based chemotherapy in early breast cancer. *Cancer Res.* 2007 ;67(2):818-26

Snijders AM, Nowak N, Segreaves R, et al. Assembly of microarrays for genome-wide measurement of DNA copy number. *Nat Genet* 2001;**29**(3):263-4.

## **COPY NUMBER ANALYSIS OF *PER3***

All tumor DNA samples were obtained from frozen breast tumors with >50% tumor cells. The genomic sequence of *PER3* (GenBank accession NM\_016831.1) was used to design a set of primers and probe specific to the *PER3* gene (Primer Express software version 1.0 (Applied Biosystems)). The primers for *PER3* were 5'- GGAGTGAGAAACCGGTGTCTGT-3' (forward) and 5'- GCCCGCAGCCTGCTT -3' (reverse). The probe for *PER3* was 5'-(6-FAM) - CTGACTGCAAAGTGAG-(TAMRA)-3', where FAM is 6-carboxyfluorescein and TAMRA is 6-carboxytetramethylrhodamine. The primers and probe for RNaseP used as an endogenous control gene were obtained from Applied Biosystems. The RNaseP probe was labeled at 5' end with VIC (Applied Biosystems) instead of FAM. *PER3* copy number was determined by relative quantification using the  $\Delta\Delta C_t$  method normalized to the RNaseP copy number of two<sup>25</sup>. To analyze the results from the copy number experiment we used the TaqMan® Gene Copy Number Assays Macro File (Applied Biosystems).

## **ISOLATION and SEQUENCING OF *PER3* cDNA.**

We analyzed the sequence of *PER3* cDNA in 35 breast cancer cell lines (see y Tables 2 and 3, and Figure 2). No evidence for the presence of any non-conservative tumor-specific structural changes was detected, although several known polymorphisms were found in this analysis.

# PER3 sequencing in Breast Cancer Cell Lines

We performed a mutation screening covering whole coding region of PER3 by direct Sanger sequencing in 35 breast cancer cell lines. We synthesized cDNA from 35 breast cancer cell lines and did RT-PCR using designed 7 forward and reverse primers (**Table 2**) for PER3 coding region. PCR reactions were carried out in a volume of 25 ul containing 100 ng cDNA, 10 pmol of each primer, 250 mM each dNTP, 0.5 U of Taq polymerase and the reaction buffer provided by the supplier (Qiagen, Hilden, Germany). Whole PER3 coding regions were sequenced using the Taq dideoxy terminator cycle sequencing kit and an ABI 3730 DNA sequencer (Applied Biosystems).

We could identify several single nucleotide polymorphisms and silent mutations (V419M, S445S, I606I, V639G, L697L, T725T, P745P, L827P, P856A, S864S, T1010T, M1028T, and H1149R). No clear pathogenic mutations like nonsense and missense mutations were identified (**Table 3**)

**Table 2. Primer sequences of PER3 mutation screening**

| Fragment | Forward primer | Sequence             | Reverse primer | Sequence             | Size (bp) |
|----------|----------------|----------------------|----------------|----------------------|-----------|
| 1        | PER3_RT1F      | gaaaagctcctcggagatga | PER3_RT1R      | tcatgtcttgaggtgcaagc | 704       |
| 2        | PER3_RT2F      | aacaggctgctttgatcctg | PER3_RT2R      | gtgggctcgttcgaacttta | 696       |
| 3        | PER3_RT3F      | cagttggtcagctttgtga  | PER3_RT3R      | tcatctgccttgggttctg  | 681       |
| 4        | PER3_RT4F      | ggatttgaggaacgatgagc | PER3_RT4R      | gtgttcgagctgctgctgt  | 696       |
| 5        | PER3_RT5F      | gcaagaaagcaggagcaaag | PER3_RT5R      | tggagattcagagggtctgg | 700       |
| 6        | PER3_RT6F      | gtcgtcagcaatgagtccaa | PER3_RT6R      | gagaatgcgctcaggtgtct | 700       |
| 7        | PER3_RT7F      | aaaatgggcagcaatctcag | PER3_RT7R      | ggtttggggctcattctagc | 702       |

**Table 3. Polymorphisms and silent mutations of PER3 in 35 breast cancer cell lines**

| Name   | Fragment | Codon | Nucleotide change | Aminoacid change |
|--------|----------|-------|-------------------|------------------|
| V419M  | 3        | 419   | GTG-->ATG         | Val-->Met        |
| S445S  | 3        | 445   | AGT -->AGC        | Ser-->Ser        |
| I606I  | 4        | 606   | ATA-->ATT         | Ile-->Ile        |
| V639G  | 4        | 639   | GTC-->GGC         | Val-->Gly        |
| L697L  | 4        | 697   | AAG-->AAA         | Lys-->Lys        |
| T725T  | 4        | 725   | ACT-->ACA         | Thr-->Thr        |
| P745P  | 4        | 745   | CCG-->CCA         | Pro-->Pro        |
| L827P  | 5        | 827   | CTG-->CCG         | Leu-->Pro        |
| P856A  | 5        | 856   | CCT-->GCT         | Pro-->Ala        |
| S864S  | 5        | 864   | TCG-->TCA         | Ser-->Ser        |
| M1028T | 6        | 1028  | ATG-->ACG         | Met-->Thr        |
| T1010T | 6        | 1010  | ACA-->ACG         | Thr-->Thr        |
| H1149R | 7        | 1149  | CAT-->CGT         | His-->Arg        |

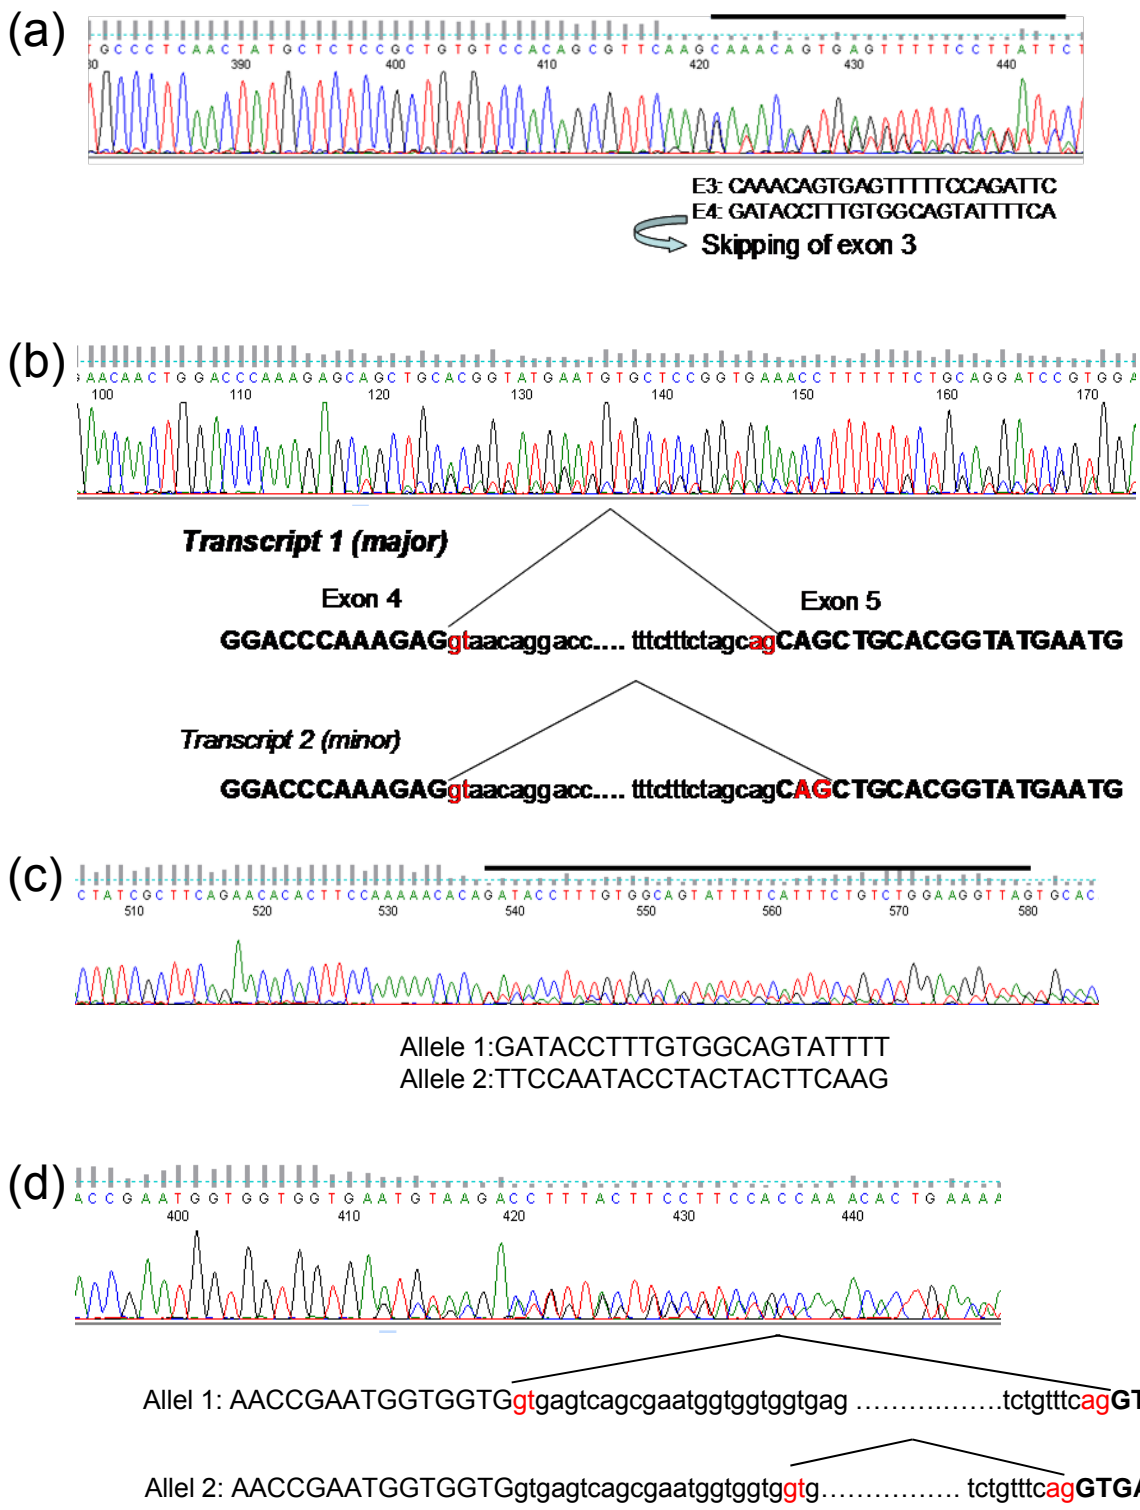

Figure 2

Four alternative splicing isoforms were identified. (a) exon 3 skipping isoform was found in three breast cell lines (b) Differentially expressed two isoforms were identified in intron 4. The major isoform contains one more amino acid (Alanine, GCA) than minor form in the beginning of exon 5. All 35 breast cancer cell lines showed higher expression of the major isoform (containing one more Alanine) allele by RT-PCR and sequencing analysis.

(c-d) Additional two alternative splicing were found in fragment 1 and 3, respectively

|                                 | n   | Per3 low |     | Per3 normal/high |      | p-value |
|---------------------------------|-----|----------|-----|------------------|------|---------|
|                                 |     | n        | (%) | n                | (%)  |         |
| <b>All patients</b>             | 412 | 122      | 30% | 291              | 70%  |         |
| <b>Estrogen Receptor</b>        |     |          |     |                  |      |         |
| ER positive                     | 301 | 69       | 23% | 233              | 77%  | <0.001  |
| ER negative                     | 111 | 53       | 48% | 58               | 52%  |         |
| <b>Tumor size</b>               |     |          |     |                  |      |         |
| ≤ 20mm                          | 202 | 48       | 24% | 154              | 76%  | 0.02    |
| >20mm                           | 209 | 72       | 34% | 137              | 66%  |         |
| <b>Lymph Node Status</b>        |     |          |     |                  |      |         |
| Negative                        | 202 | 56       | 28% | 146              | 72%  | 0.45    |
| Positive                        | 211 | 66       | 41% | 145              | 69%  |         |
| <b>Age at diagnosis (years)</b> |     |          |     |                  |      |         |
| < 40                            | 79  | 30       | 62% | 49               | 38%  |         |
| 40 - 44                         | 102 | 26       | 75% | 76               | 25%  |         |
| 45 - 49                         | 115 | 39       | 34% | 76               | 66%  |         |
| ≥ 50                            | 115 | 27       | 23% | 89               | 77%  |         |
| <b>Histological Grade</b>       |     |          |     |                  |      |         |
| Well differentiated             | 78  | 24       | 30% | 55               | 70%  | 0.99    |
| Intermediate                    | 109 | 32       | 29% | 77               | 71%  |         |
| Poorly differentiated           | 138 | 42       | 30% | 96               | 70%  |         |
| <b>Tumor Class</b>              |     |          |     |                  |      |         |
| Basal                           | 73  | 34       | 47% | 39               | 53%  | 0.001   |
| ERBB2                           | 56  | 24       | 43% | 32               | 57%  |         |
| Luminal A                       | 90  | 17       | 19% | 73               | 81%  |         |
| Luminal B                       | 67  | 25       | 37% | 43               | 63%  |         |
| Normal-like                     | 17  | 0        | 0%  | 17               | 100% |         |
| Unclassified                    | 110 | 22       | 80% | 87               | 80%  |         |
| <b>Treatment</b>                |     |          |     |                  |      |         |
| Chemo                           | 171 | 49       | 29% | 123              | 71%  | 0.4     |
| Non Chemo                       | 239 | 72       | 30% | 167              | 70%  |         |
| <b>Hormonal</b>                 |     |          |     |                  |      |         |
| Only Chemo                      | 105 | 12       | 25% | 36               | 75%  | 0.3     |
| Non Hormonal                    | 305 | 60       | 31% | 145              | 69%  |         |
| <b>Treatment</b>                |     |          |     |                  |      |         |
| Only Chemo                      | 114 | 35       | 31% | 79               | 69%  | 0.21    |
| Chemo + Hormonal                | 55  | 14       | 26% | 41               | 76%  |         |
| Only Hormonal                   | 48  | 12       | 25% | 36               | 75%  |         |
| No Treatment                    | 191 | 60       | 31% | 131              | 69%  |         |

**TABLE 4.** Relationship between *Per3* expression levels and clinical-pathological data of the 413 patients from Van de Vijver et al 2002, and Chin et al. 2006



**All patients  
n= 413**

**FIGURE 3**

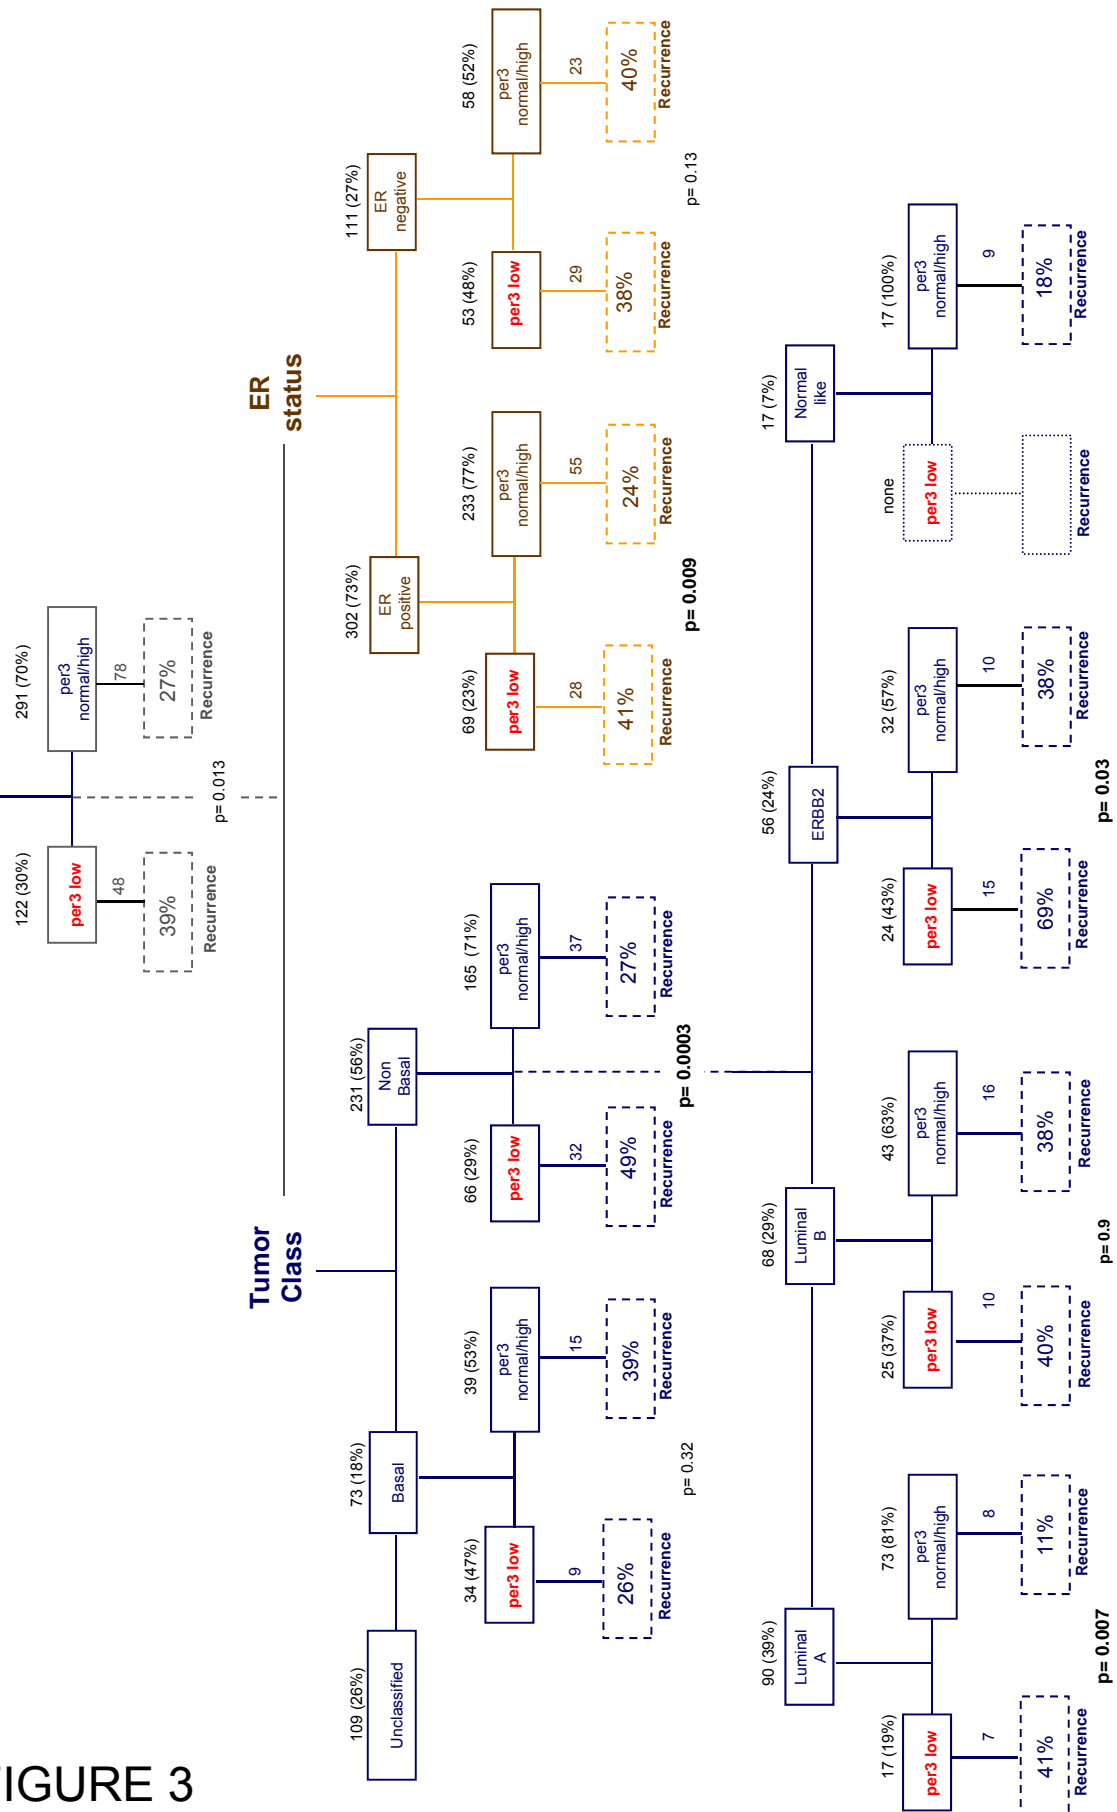

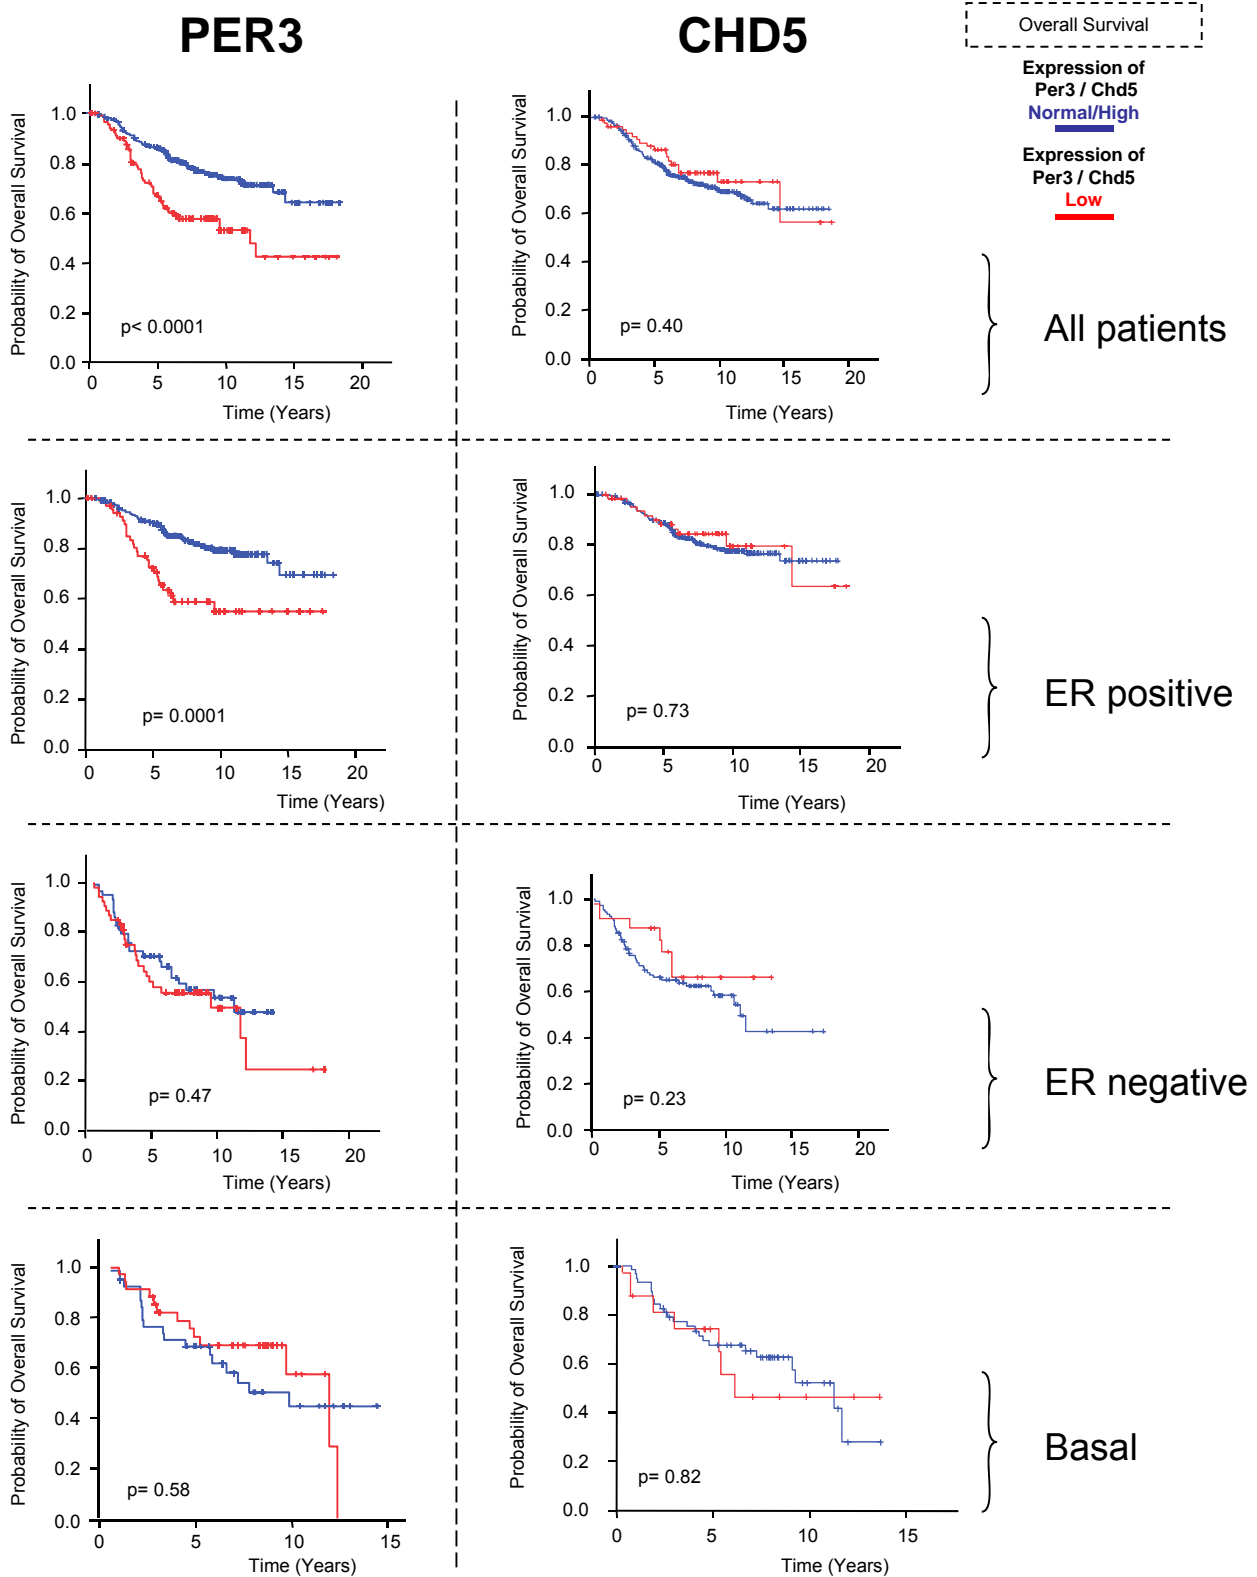

**FIGURE 4.-** Differences between Kaplan Meier Estimates for Overall Survival according the expression levels of Per3 (left column) and Chd5 (right column) in all patients (top) and three different subgroups of patients based on ER positive, ER negative and basal type tumors. P-values were calculated using log-rank test.

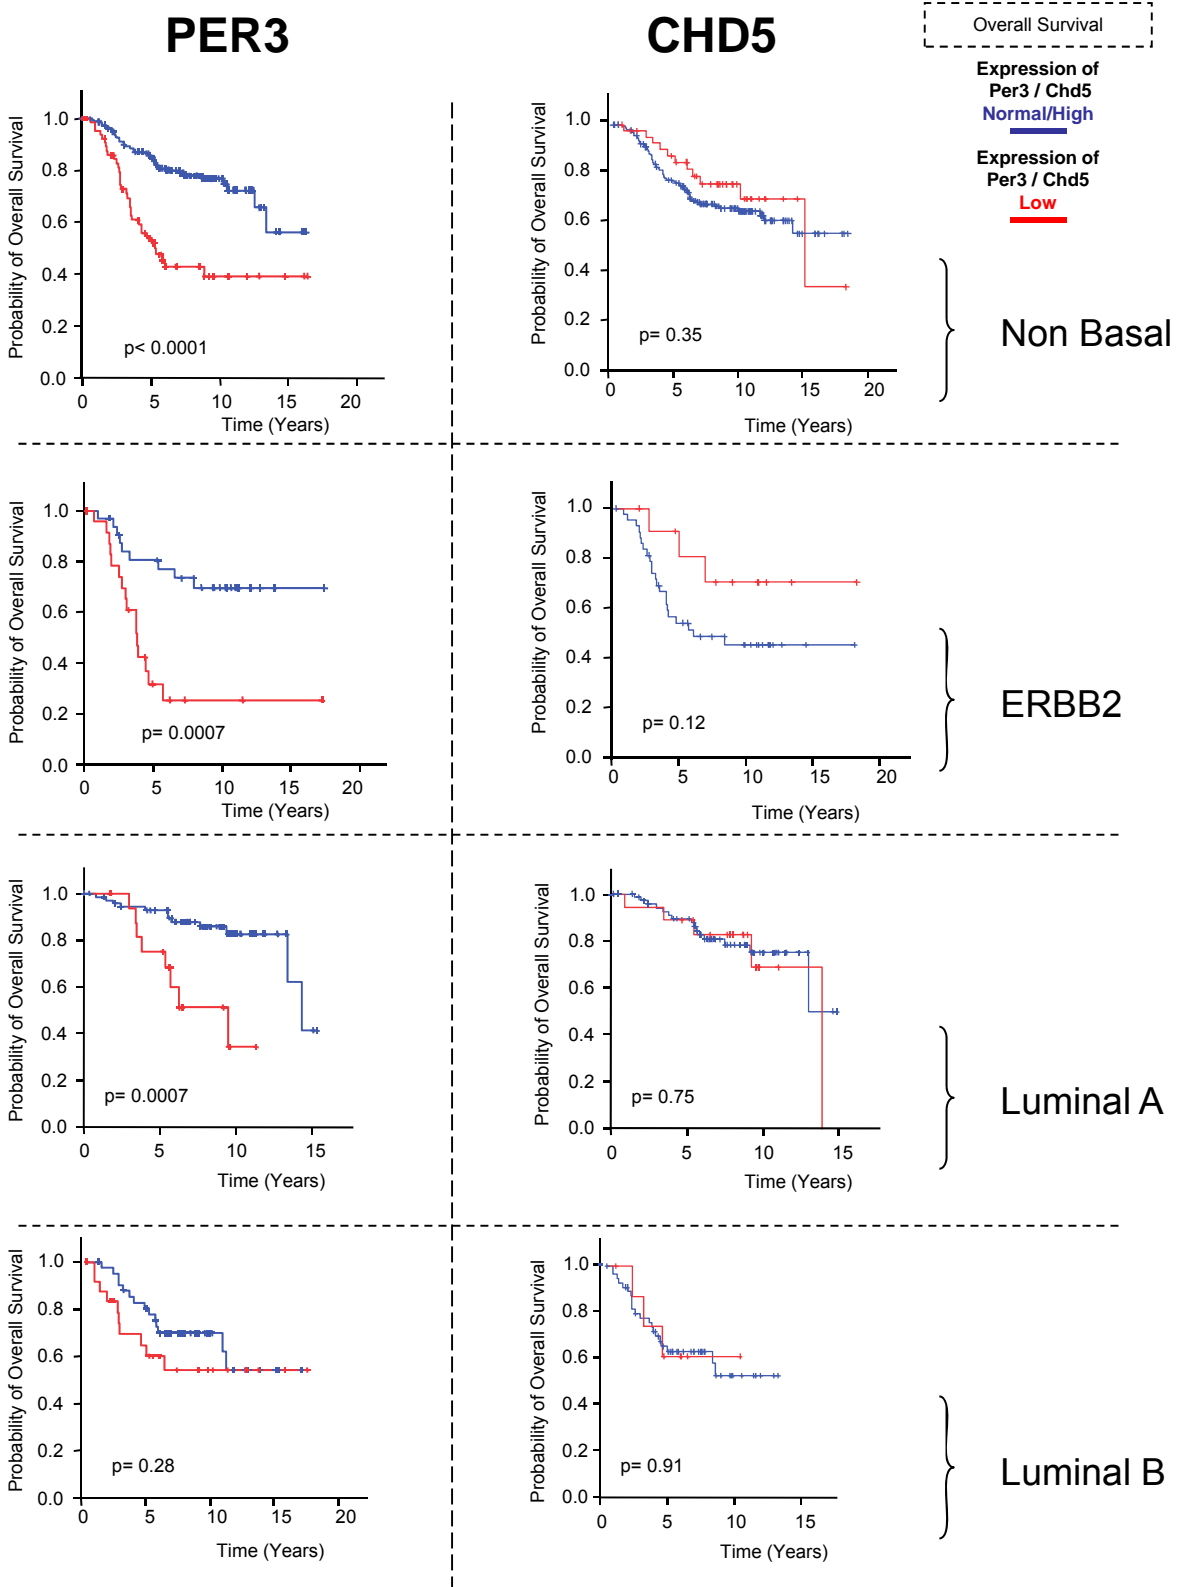

**FIGURE 5.-** Differences between Kaplan Meier Estimates for Overall Survival according the expression levels of Per3 (left column) and Chd5 (right column) in 4 different subgroups of patients based on Non basal, ERBB2, Luminal A and Luminal B tumor subtypes. P-values were calculated using log-rank test.

| Number of PER3 mice    | Genotype |          |           |           |            |           | Total<br>78<br>n |
|------------------------|----------|----------|-----------|-----------|------------|-----------|------------------|
|                        | WT<br>17 |          | HET<br>33 |           | NULL<br>28 |           |                  |
|                        | n        | (%)      | n         | (%)       | n          | (%)       |                  |
| Lymphoma or leukemia   | 7        | 41       | 18        | 55        | 9          | 32        | 34               |
| Lung                   | 7        | 41       | 12        | 36        | 10         | 36        | 29               |
| Ovary                  | 5        | 29       | 4         | 12        | 7          | 25        | 16               |
| Breast hyperplasia     | 1        | 6        | 1         | 3         | 2          | 7         | 4                |
| Breast                 | <b>0</b> | <b>0</b> | <b>4</b>  | <b>12</b> | <b>10</b>  | <b>36</b> | 14               |
| Skin Ca                | 3        | 18       | 3         | 9         | 1          | 4         | 7                |
| Liver /kidney          | 0        | 0        | 0         | 0         | 3          | 11        | 3                |
| Ca in rectal prolapsus | 0        | 0        | 1         | 3         | 1          | 4         | 2                |
| Utherus                | 1        | 6        | 0         | 0         | 0          | 0         | 1                |
| Subcutaneous sarcoma   | 0        | 0        | 2         | 6         | 0          | 0         | 2                |

**TABLE 5.** Number of tumors generated by the treatment with DMBA (7, 12-dimethylbenz[a]anthracene ) by oral gavage in PER3 mice.
